# Supplementary material
Source: Springer Nature journal article supplement (https://www.springermedizin.de/resource/supplementary/12943_2013_1241_MOESM10_ESM.pdf/9553012)

GFP AD-17

~170 kDa

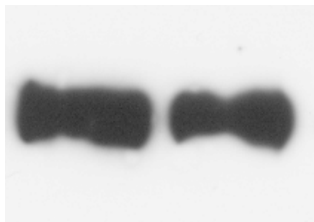

Anti-EGFR

~170 kDa

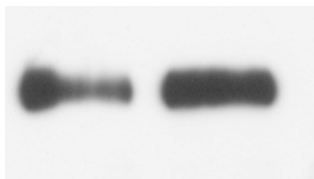

Anti-phospho-EGFR

~35 kDa

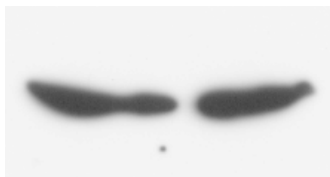

Anti-GAPDH

EGFR phosphorylation level:

1.0

1.64

Supplement: MOESM10 [file 9553012]
